# Supplementary material for: Inositol Hexakisphosphate Kinase 3 Regulates Metabolism and Lifespan in Mice
Source: Sci Rep. 2016 Aug 31;6:32072. doi: 10.1038/srep32072 (PMC5006000; doi:10.1038/srep32072)
Supplement: Supplementary Information [file srep32072-s1.pdf]

## **Supplementary Information**

# **Inositol hexakisphosphate kinase 3 regulates metabolism and lifespan in mice**

**Yusuke Moritoh<sup>1</sup>, Masahiro Oka<sup>1</sup>, Yoshitaka Yasuhara<sup>1</sup>, Hiroyuki Hozumi<sup>1</sup>, Kimihiko Iwachidow<sup>2</sup>, Hiromitsu Fuse<sup>2</sup> & Ryuichi Tozawa<sup>1</sup>**

<sup>1</sup>Cardiovascular and Metabolic Drug Discovery Unit, Pharmaceutical Research Division, Takeda Pharmaceutical Company Limited, Fujisawa, Japan

<sup>2</sup>Integrated Technology Research Laboratories, Pharmaceutical Research Division, Takeda Pharmaceutical Company Limited, Fujisawa, Japan

## **Supplementary methods**

**Cells.** Human SJCRH30, HeLa, and HEK293 cells were obtained from the American Type Culture Collection (ATCC). SJCRH30 cells were maintained in RPMI1640 medium containing 25 mM glucose and 10% foetal bovine serum (FBS, HyClone, GE Healthcare). HeLa and HEK293 cells were cultured in Eagle's minimum essential medium containing 10% FBS. MIN6 cells were maintained in Dulbecco's modified Eagle's medium containing 25 mM glucose, 15% FBS, and 55  $\mu$ M 2-mercaptoethanol. INS-1 832/13 cells were grown in RPMI 1640 medium containing L-glutamine, 1 mM sodium pyruvate, 10 mM HEPES, 10% FBS, and 55  $\mu$ M 2-mercaptoethanol. All cells were cultured in a humidified atmosphere containing 5% CO<sub>2</sub>/95% air at 37°C.

**Localization of AcGFP-IP6K proteins.** The *AcGFP* gene was fused to the N-terminal region of human *IP6K1*, *IP6K2*, and *IP6K3* coding sequences and subcloned into the pEBMulti-Neo vector (Wako). Transfection was performed using FugeneHD (Roche) or Lipofectamine 3000 (Thermo Fisher Scientific). Each construct was transfected into C2C12 cells and SJCRH30 cells, and cells were cultured for an additional 2-4 days. Images were obtained from a highly sensitive charge-coupled device (CCD) camera fitted to the microscope (DP73/IX71; Olympus).

**Human islet cDNA.** Human islet cDNA (50  $\mu$ L cDNA synthesized from 0.5  $\mu$ g total RNA from each of 3 normal individuals: a 51-year-old male, a 52-year-old female, and a 50-year-old female) was obtained from Cosmobio.

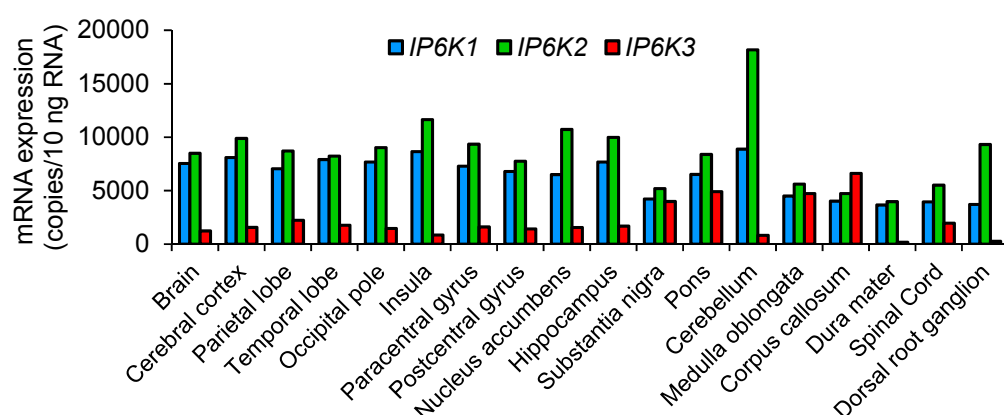

**Figure S1. *IP6K3* expression in the human brain.** *IP6K3* showed brain-region dependent expression. *IP6K3* mRNA levels were lower overall compared to *IP6K1* and *IP6K2*. Two technical replicates were performed per pooled human sample.

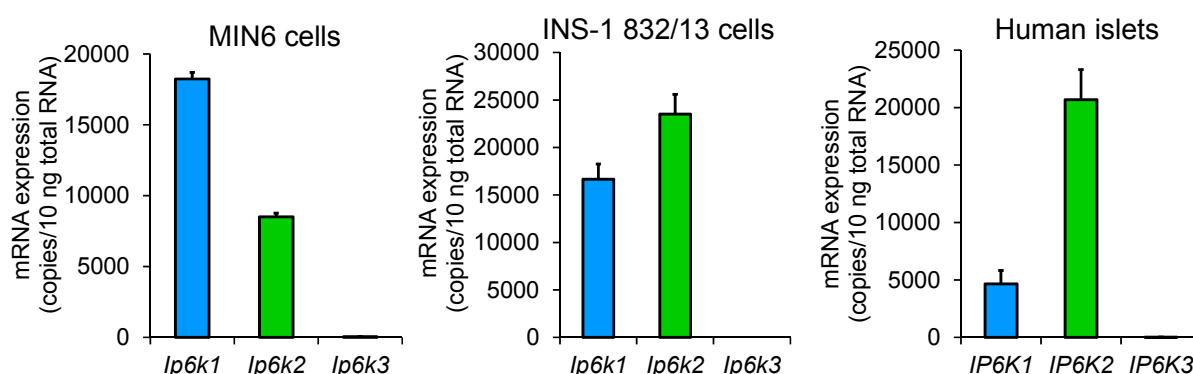

**Figure S2. Rodent *Ip6k3* and human *IP6K3* are undetectable in pancreatic endocrine cells.** mRNA expression in mouse MIN6, rat INS-1 832/13, and human islets. *Ip6k3* mRNA was not expressed in MIN6 and INS-1 832/13 beta cell lines. In addition, *IP6K3* mRNA was undetectable in human islets. The means  $\pm$  SD of three (MIN6 and human islets) and four (INS-1) independent samples are shown. Two technical replicates were performed per sample.

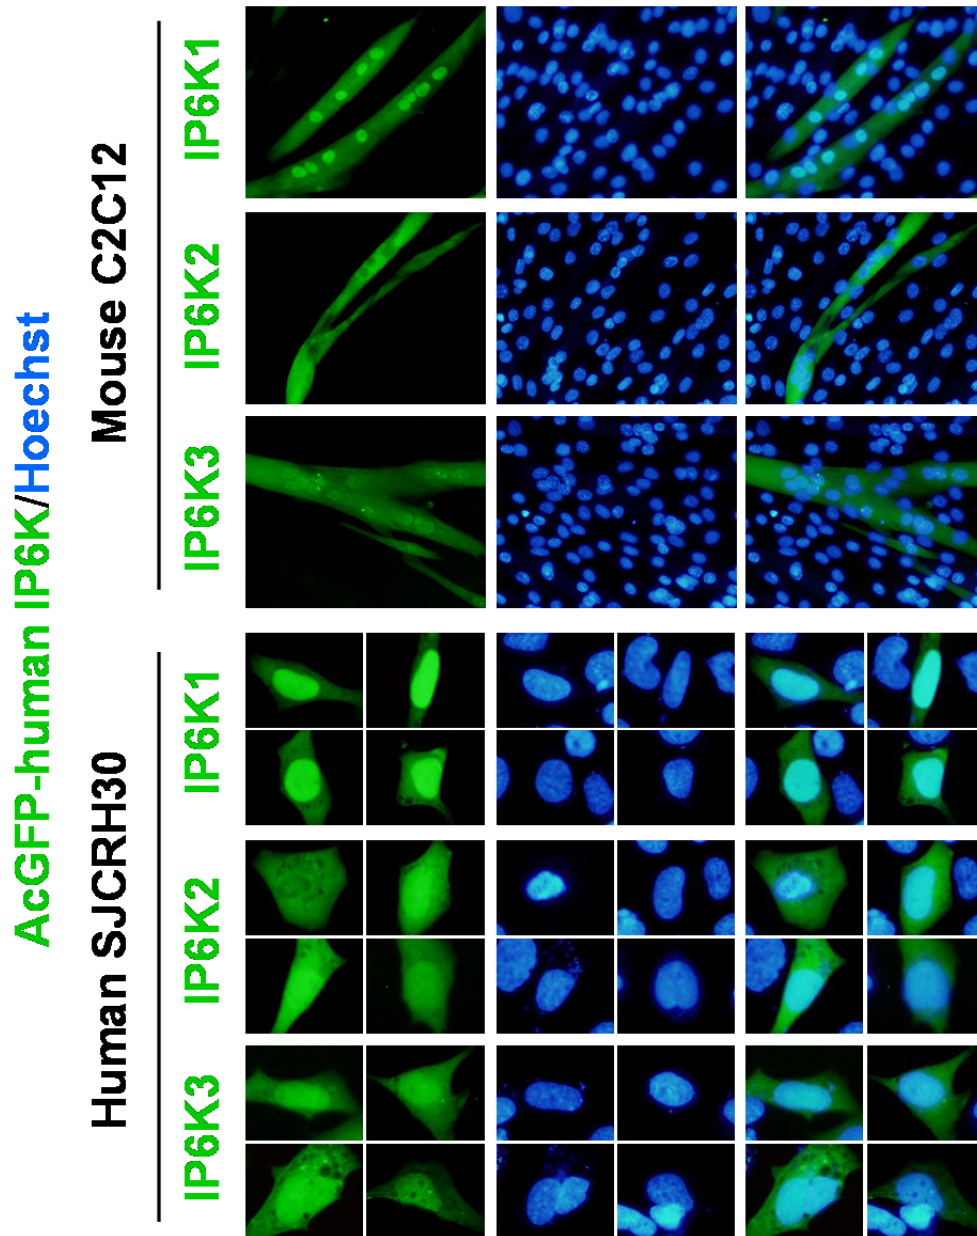

**Figure S3. AcGFP-hIP6K3 fusion protein localizes to the nucleus and the cytoplasm in mouse C2C12 cells and a human SJCRH30 rhabdomyosarcoma cells.** AcGFP-IP6K1, AcGFP-IP6K2, and AcGFP-IP6K3 fusion constructs were transfected into C2C12 or SJCRH30 cells. Cells were visualized with AcGFP and nuclear staining (Hoechst 33342) at 2-4 days after transfection. AcGFP-IP6K3 was localized to the nucleus and the cytosol in both cell lines. Data shown are representative images of three independent experiments. Images were obtained from a highly sensitive charge-coupled device (CCD) camera fitted to the microscope (DP73/IX71; Olympus).

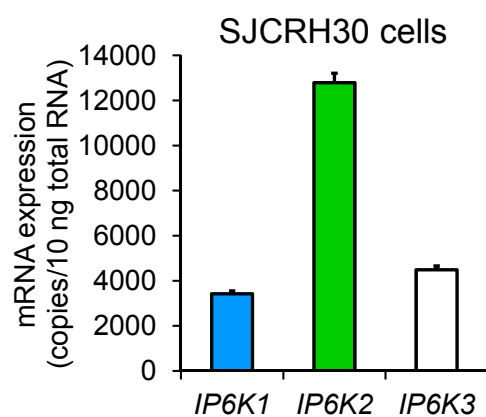

**Figure S4. The human SJCRH30 rhabdomyosarcoma cell line expresses *IP6K3***

The means  $\pm$  SD of four independent samples consisting of two technical replicates.

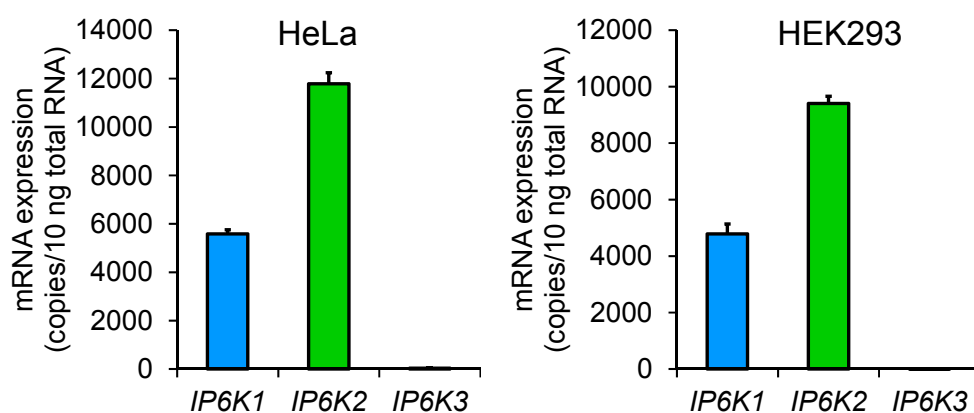

**Figure S5. *IP6K1*, *IP6K2*, and *IP6K3* mRNA expression in HeLa and HEK293 cells.**

*IP6K3* mRNA was undetectable in human HeLa and HEK293 cell lines. The results represent the means  $\pm$  SD obtained from four independent samples consisting of two technical replicates.

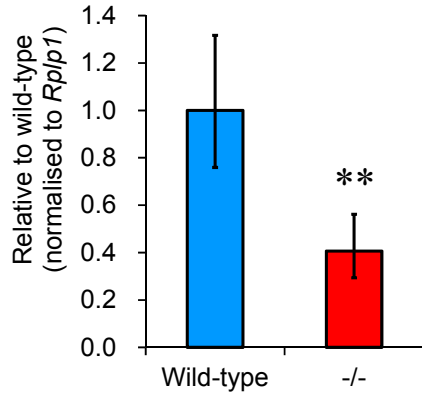

**Figure S6. *Pdk4* mRNA levels in the hearts of *Ip6k3*<sup>-/-</sup> mice.**

*Pdk4* mRNA is reduced in the heart of *Ip6k3*<sup>-/-</sup> mice. B6;129-*Ip6k3*<sup>-/-</sup> and wild-type littermates at 11 weeks of age were used for the analysis. The range given for each mRNA level relative to wild-type was determined by using the comparative  $C_T$  method. The  $\Delta C_T$  value is determined by subtracting the average *Rplp1*  $C_T$  value from the average *Pdk4*  $C_T$  value. The calculation of  $\Delta\Delta C_T$  involves subtraction by the  $\Delta C_T$  calibrator value (wild-type littermates). The data range given is determined by evaluating the expression:  $2^{-\Delta\Delta C_T}$  with  $\Delta\Delta C_T + s$  and  $\Delta\Delta C_T - s$ , where  $s$  = the standard deviation of the  $\Delta\Delta C_T$  value.  $n = 4$  and  $6$  for wild-type and *Ip6k3*<sup>-/-</sup> mice. \*\* $P < 0.01$  by the Student's  $t$ -test.

**Table. S1. Primers, probes, and standard sequences.**

| Sequence Name  | Sequences                                                                                                                  |
|----------------|----------------------------------------------------------------------------------------------------------------------------|
| Hs_IP6K1-F     | CAGGCAGTGGCAGTGACC                                                                                                         |
| Hs_IP6K1-P     | AGAAAGCCAGCCTGTCCCTTGAGACC                                                                                                 |
| Hs_IP6K1-R     | GGACTCTTTGCCTCCTGTGAG                                                                                                      |
| Hs_IP6K1-std   | CCGGTCAGGCAGTGGCAGTGACCACAAGGAGAGAAAGCCAGCCTGTCCCTTGAGACCT<br>CTGAGAGCTCACAGGAGGCAAAGAGTCCGAAGG                            |
| Hs_IP6K2-F     | CATGCGTGCTCCGCTTCAA                                                                                                        |
| Hs_IP6K2-P     | AGACAACCCTGTGCAAGCCCCTGGTC                                                                                                 |
| Hs_IP6K2-R     | GCATCTCAGCAGGGAGGGTC                                                                                                       |
| Hs_IP6K2-std   | GCACTCATGCGTGCTCCGCTTCAATGAGACAACCCTGTGCAAGCCCCTGGTCCCAAGGGA<br>ACATCAGTTCTACGAGACCCCTCCCTGCTGAGATGCGCAA                   |
| Hs_IP6K3-F     | TCACCCACAGTACAAAGGTAC                                                                                                      |
| Hs_IP6K3-P     | AAGACAGCACAGGCCATCTCAGCTTGG                                                                                                |
| Hs_IP6K3-R     | GGCTCTCCTTCACTGGGTTG                                                                                                       |
| Hs_IP6K3-std   | GCGGTTACCCACAGTACAAAGGTACCGTCACAGTGACCTCTGGAAAGACAGCACAGG<br>CCATCTCAGCTTGGTTGCCAACCCAGTGAAGGAGAGCCAGGAG                   |
| Hs_IPMK-F      | GGCACAGTTTTGAAACAGTTACAAC                                                                                                  |
| Hs_IPMK-P      | ACCTCCAAGGGGCCAAGAGAGCTG                                                                                                   |
| Hs_IPMK-R      | CGTAGCTCTAGAAGAACACCATCA                                                                                                   |
| Hs_IPMK-std    | CAGATGGCACAGTTTTGAAACAGTTACAACCACCTCCAAGGGGCCAAGAGAGCTGGAAT<br>TCTATAATATGGTTTATGCTGCTGACTGTTTTGATGGTGTCTTCTAGAGCTACGAAAAT |
| Hs_IPPK-F      | TGGGAAGTGGAAGCAGATCAG                                                                                                      |
| Hs_IPPK-P      | ACTGTCCCCTTGATCTCTACTCAGGAAACA                                                                                             |
| Hs_IPPK-R      | CAGCAAACCTCTTCAAGGCAAAG                                                                                                    |
| Hs_IPPK-std    | GCAACTGGGAAGTGGAAGCAGATCAGCAAATACTGTCCCCTTGATCTCTACTCAGGAAAC<br>AAACAGAGAATGCACTTTGCCTTGAAGAGTTTGCTGCAGGA                  |
| Hs_ITPK1-F     | GTCCTACACCGTGGTCCAGA                                                                                                       |
| Hs_ITPK1-P     | TTCTCCGAGGCACATCAGACCGTGA                                                                                                  |
| Hs_ITPK1-R     | CGTTGTGGCTGTTGAAGAAGATG                                                                                                    |
| Hs_ITPK1-std   | GGCGAGTCTACACCGTGGTCCAGAGGCCCTCACTCAAGAACTTCTCCGAGGCACATCA<br>GACCGTGAGTCCATCTTCTTCAACAGCCACAACGTGTCA                      |
| Hs_ITPKA-F     | GCGAGGACGTGGGTCCAGA                                                                                                        |
| Hs_ITPKA-P     | ACCACTGGCAGAAGATCCGGACCATGG                                                                                                |
| Hs_ITPKA-R     | CGCTTCTTGAAAGGGCTTATGA                                                                                                     |
| Hs_ITPKA-std   | AGCGGGCGAGGACGTGGGTCCAGAAAAACCACTGGCAGAAGATCCGGACCATGGTCAATC<br>TGCCGGTCATAAGCCCTTTCAAGAAGCGCTACG                          |
| Hs_ITPKB-F     | CCTGTGTGATGGACTGCAAGA                                                                                                      |
| Hs_ITPKB-P     | AGCTCCTCCTCCAGGTAGGTCCTGATTC                                                                                               |
| Hs_ITPKB-R     | CGCAGGCTGGGCTTCTTC                                                                                                         |
| Hs_ITPKB-std   | CTCGCCCTGTGTGATGGACTGCAAGATGGGAATCAGGACCTACCTGGAGGAGGAGCTCAC<br>GAAGGCCCCGAAGAAGCCAGCCTGCGGAAGG                            |
| Hs_ITPKC-F     | CACCCTTTGTGGTCTCCTTCC                                                                                                      |
| Hs_ITPKC-P     | AACACTACCCTTGGGTCCAGCTTTCTGG                                                                                               |
| Hs_ITPKC-R     | CCATCCTCTCCTGCCTGGAA                                                                                                       |
| Hs_ITPKC-std   | GTATTCACCCTTTGTGGTCTCCTTCCGAAAACACTACCCTTGGGTCCAGCTTCTGGACAT<br>GCTGGGAATTCAGGCAGGAGAGGATGGTCGGA                           |
| Hs_PPIP5K1-F   | TTCCCTACGTCAAGTGAGTGAA                                                                                                     |
| Hs_PPIP5K1-P   | CTTGAGTAGAGTCTGCCAGCGCCACAC                                                                                                |
| Hs_PPIP5K1-R   | TGCTGTGCATGGAATCAAAGAG                                                                                                     |
| Hs_PPIP5K1-std | GCCCTTTCCCTACGTCAAGTGAGTGAATTCTTGAGTAGAGTCTGCCAGCGCCACACTGATG<br>CCCAGGCACAGGCATCTGCAGCCCTCTTTGATTCCATGCACAGCAGCCAG        |
| Hs_PPIP5K2-F   | GCAGATATTGTTATCCCTCAGGAATA                                                                                                 |
| Hs_PPIP5K2-P   | ACTGGAGATTGCCAAAGGCTACTGTACTCC                                                                                             |

|               |                                                                                                                              |
|---------------|------------------------------------------------------------------------------------------------------------------------------|
| Hs_PIP5K2-R   | AGGTCTGAGCGAATTTTCTAACC                                                                                                      |
| Hs_PIP5K2-std | CATTAGCAGATATTGTTATCCCTCAGGAATATGGTATAACTAAAGCTGAAAACTGGAGA<br>TTGCCAAAGGCTACTGTACTCCTCTGGTTAGAAAAATTCGCTCAGACCTTCAGA        |
| Hs_PDK4-F     | TCGTGTATGTTCCCTTCTCACCTC                                                                                                     |
| Hs_PDK4-P     | TGTTCAACTGTTGCCCGCATTGCATTCT                                                                                                 |
| Hs_PDK4-R     | GGTGTAAGGGAAGGCTGATTTTC                                                                                                      |
| Hs_CKM-F      | CACTGCTCCCGTGGCGAG                                                                                                           |
| Hs_CKM-P      | CCCGTCAGGCTGTTGAGAGCTTCCACA                                                                                                  |
| Hs_CKM-R      | CATGCTCTTCAGAGGGTAGTACTTC                                                                                                    |
| Hs_RPLP0-F    | AAACGAGTCCTGGCCTTGCTCT                                                                                                       |
| Hs_RPLP0-P    | AGACGGATTACACCTTCCCCTTGCTGA                                                                                                  |
| Hs_RPLP0-R    | GCAGATGGATCAGCCAAGAAG                                                                                                        |
| Mm_Ip6k1-F    | TCGGTCTGGCAGTGGTAGTG                                                                                                         |
| Mm_Ip6k1-P    | AAGCCAGCCTGTCCTTTGAGACCTCTGA                                                                                                 |
| Mm_Ip6k1-R    | GTTCCACCTTTGGACTCTTTGC                                                                                                       |
| Mm_Ip6k1-std  | CTGCATCGGTCTGGCAGTGGTAGTGACCACAAGGAGGAGAAAGCCAGCCTGTCCTTTGAG<br>ACCTCTGAGAGCTCCCAGGAGGCAAAGAGTCCAAAGGTGGAAGTGCAC             |
| Mm_Ip6k2-F    | GCGATGATGCTTCGGAGGAA                                                                                                         |
| Mm_Ip6k2-P    | CCGCACACTCGAACACCGATGACCG                                                                                                    |
| Mm_Ip6k2-R    | CCGCCTGGTACACCTGCA                                                                                                           |
| Mm_Ip6k2-std  | GCATGGCGATGATGCTTCGGAGGAAAAAGCAGCTAACCAGATCCGAAAATGTCAGCAGA<br>GCACGTCTGCGGTCTCGGTGTTTCGAGTGTGCGGCATGCAGGTGTACCAGGCGGGCACT   |
| Mm_Ip6k3-F    | GACACTTCAGCAGACAACCG                                                                                                         |
| Mm_Ip6k3-P    | CACCTTGGCTGCACTCTCCTTCAGTGA                                                                                                  |
| Mm_Ip6k3-R    | GTGGCAGTCGGACCTCAG                                                                                                           |
| Mm_Ip6k3-std  | TGGCAGACACTTCAGCAGACAACCGGCAGCGAGAGCAGCCCCCTGCCCCCTCACCCAGCTG<br>GCTCGCTCACTGAAGGAGAGTGCAGCCAAGGTGCTCCTGAGGTCCGACTGCCACCTCAG |
| Mm_Pdk4-F     | TGGAGTTCATGAGAAGAGCC                                                                                                         |
| Mm_Pdk4-P     | AGCCCTGTCAGAGTTTGTAGACACGCT                                                                                                  |
| Mm_Pdk4-R     | GGGACCACATTATGATGTCTGTTTC                                                                                                    |
| Mm_Rplp1-F    | AGTCTACAGCATGGCTTCCG                                                                                                         |
| Mm_Rplp1-P    | CCGTCACCTCGTCGTCGTCAGG                                                                                                       |
| Mm_Rplp1-R    | GGCATTGATCTTATCCTCCGTG                                                                                                       |

Hs, human; Mm, mouse; F, forward primer; R, reverse primer; P, probe; std, standard oligonucleotide.

All sequences are written 5' to 3'.

**Table S2. TaqMan gene expression assays.**

| Target        | TaqMan Gene Expression Assay |
|---------------|------------------------------|
| <i>Ip6k1</i>  | Mm00501996_m1                |
| <i>Ip6k2</i>  | Mm01232057_m1                |
| <i>Ip6k3</i>  | Mm00557209_m1                |
| <i>Trim63</i> | Mm01185221_m1                |
| <i>Fbxo32</i> | Mm00499523_m1                |
| <i>IP6K1</i>  | Hs01051078_m1                |
| <i>IP6K2</i>  | Hs00382829_m1                |
| <i>IP6K3</i>  | Hs00369684_m1                |

Hs, human; Mm, mouse.
